# Supplementary material for: Structure of the core human NADPH oxidase NOX2
Source: PubMed Central journal article supplement (PMC9568551; doi:10.1038/s41467-022-33711-0), 2022-10-14

## **Supplementary Information**

Structure of the core human phagocyte NADPH oxidase NOX2

## Supplementary Figures

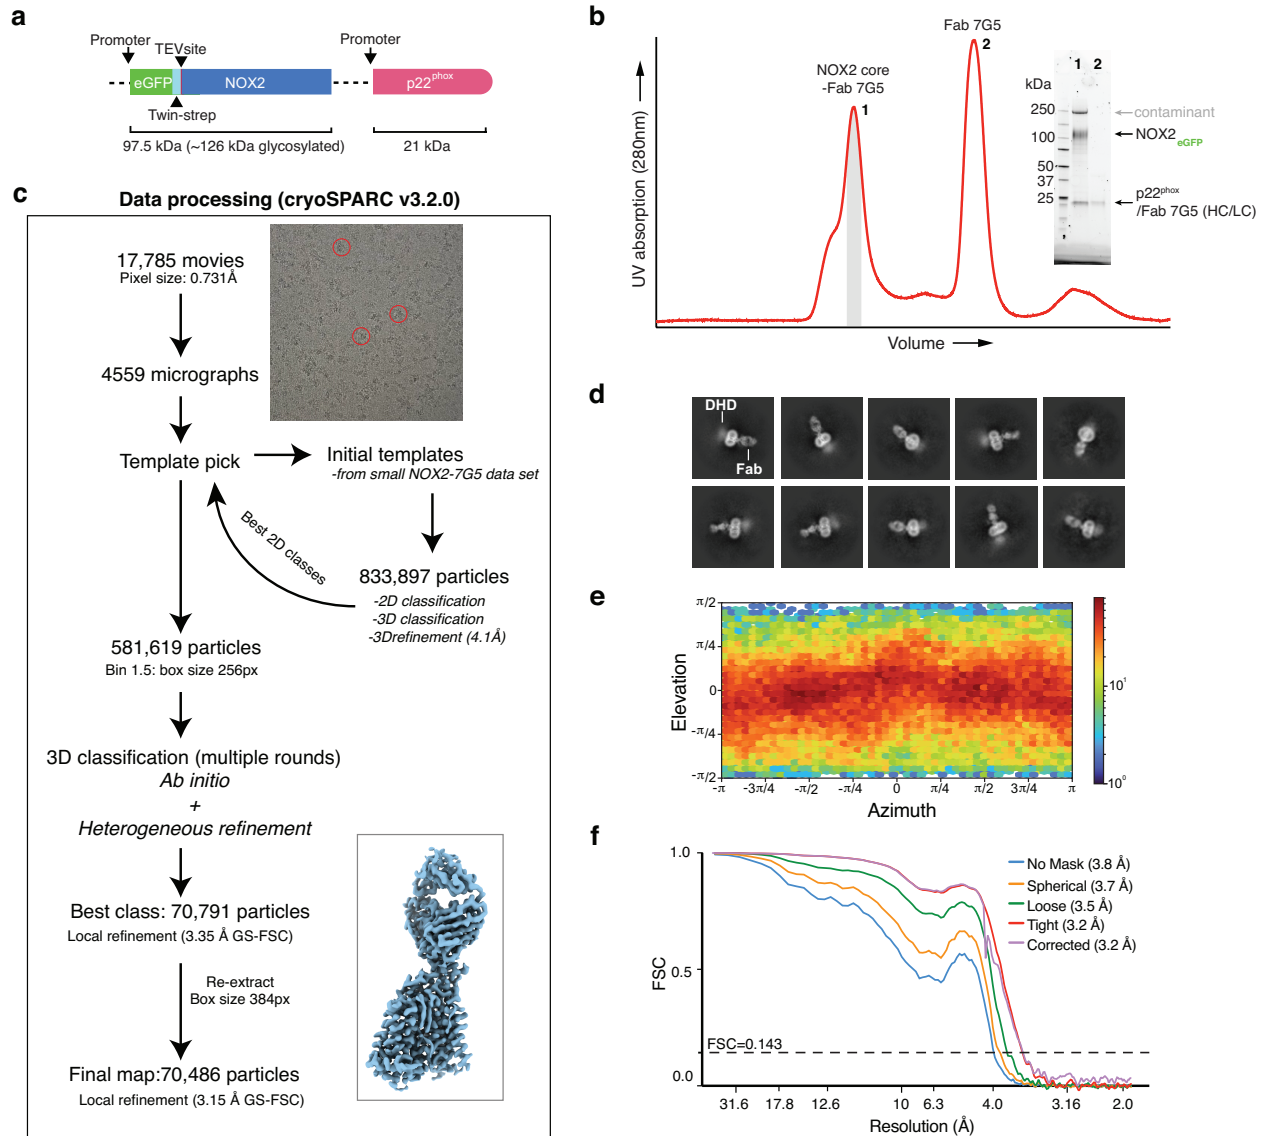

**Supplementary Figure 1. Biochemistry and cryo-EM data processing of the NOX2 core complex.** **a.** Schematic illustration of the NOX2 core bicistronic construct. **b.** Size-exclusion chromatogram of the purified NOX2 core-Fab 7G5 complex with representative SDS-PAGE of the peak 1 fraction that was used for structure determination (lane 1, highlighted in grey on the chromatogram) and the second peak where excess Fab 7G5 elutes (lane 2). The ~250 kDa

contaminant was identified as Acetyl-CoA carboxylase 1, which did not form a complex with NOX2 core-7G5. **c.** Cryo-EM data processing workflow where cryoSPARC v3.2.0 was used for particle picking, 2D classification and multiple rounds of 3D classification to reach a final three-dimensional reconstruction of NOX2 core-Fab 7G5 at 3.2 Å. **d.** Representative 2D class averages of NOX2 core-Fab 7G5 complex. **e.** Angular particle distribution of projections. **f.** Gold-standard Fourier shell correlation (GS-FSC).

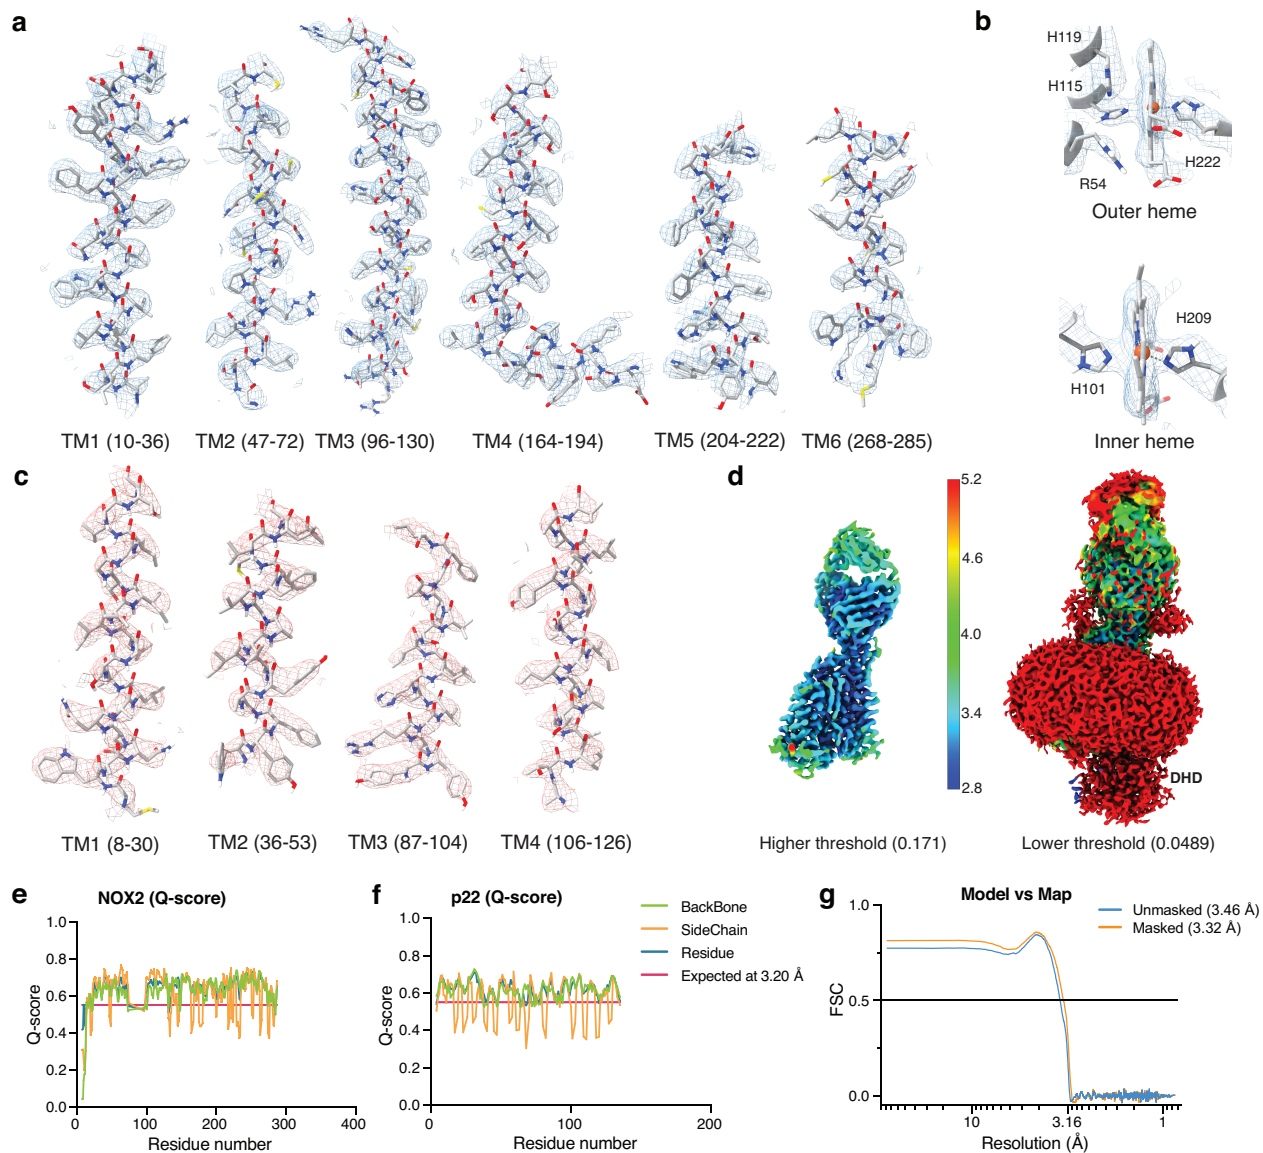

**Supplementary Figure 2. NOX2 model vs map validation.** **a.** NOX2 coordinates of each transmembrane helix (TM1-6) are colored in blue mesh. **b.** The two heme molecules that are coordinated by histidines and residues of the oxygen reduction center, all located in NOX2 are colored in blue mesh. **c.** p22<sup>phox</sup> coordinates of each transmembrane helix (TM1-4) are colored in red mesh. **d.** Local resolution estimate. **e, f.** Q-score plot of NOX2 (**e**) and p22 (**f**). **g.** Fourier shell correlation plot of model vs map

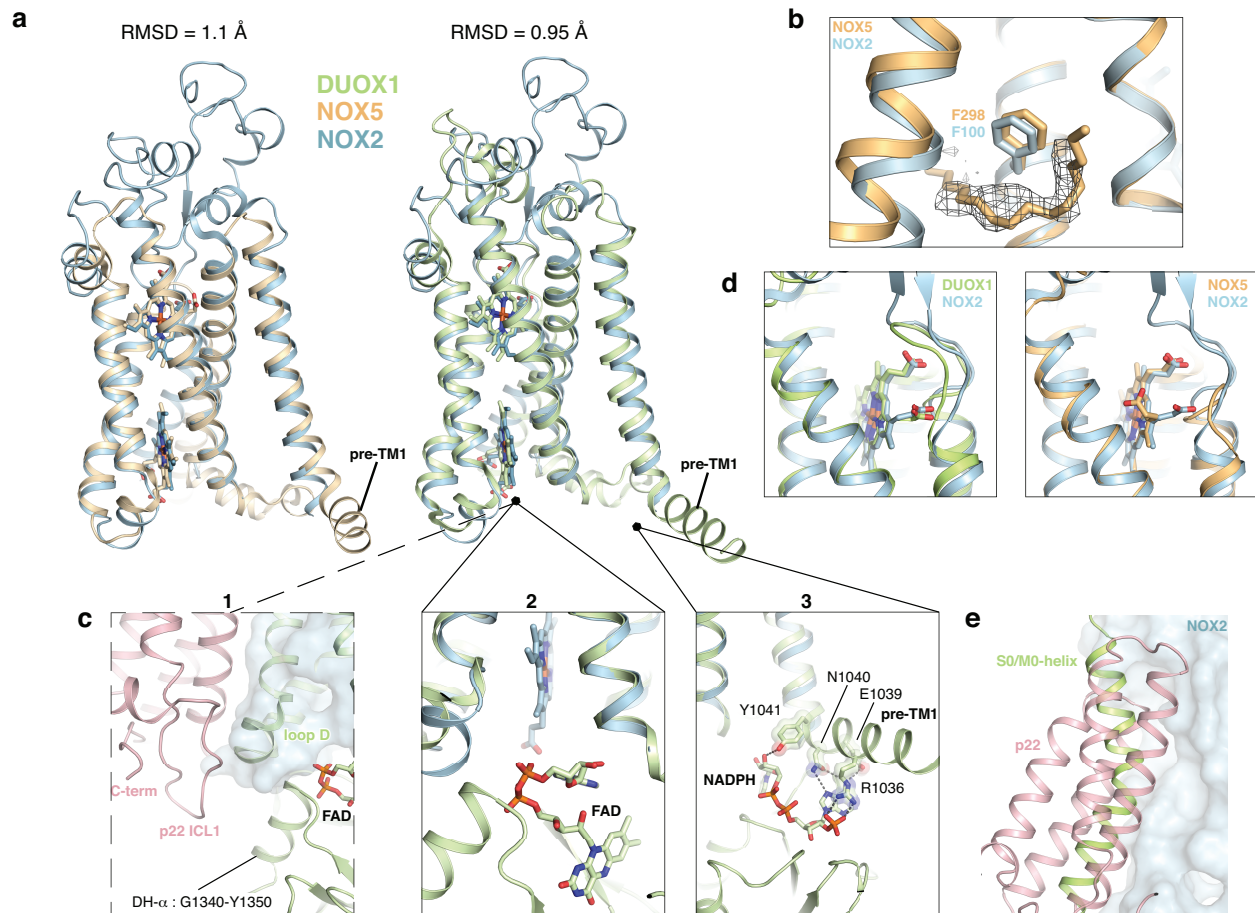

**Supplementary Figure 3. Comparison of NOX2 structure to csNOX5 and DUOX1 structures.**

**a.** Superposition of the NOX2 TMD of NOX2 (blue), human DUOX1 (green, PDB 7d3f) and csNOX5 (light orange, PDB:5o0t), with RMSD values of 1.1 Å for csNOX5, 0.97 Å for mouse DUOX1 and 0.95 Å for DUOX1. The pre-TM1 helix seen in csNOX5 and DUOX1 is not observed in NOX2, and a putative NOX2 pre-TM1 helix would only extend by 7 residues, as highlighted in **supplementary figure 5**. **b.** An alkyl chain modeled in csNOX5 (light orange, PDB:5o0t) fits within the NOX2 cryo-EM density (grey mesh) of superposed NOX2 (blue), supporting prior structural observations of this interface harboring a lipid pocket. The sidechain of Phe100, conserved in all NOX/DUOX members is shown in close proximity of the modeled alkyl chain. **c.** Overlay of the NOX2 core and DUOX1 (green, PDB: 7d3f), places the DHD underneath NOX2 and FAD close to the inner heme. Panel 1 shows that p22 ICL1 is in close proximity of DH- $\alpha$  helix of DUOX1.

The equivalent DH- $\alpha$  region in NOX2 been shown to bind to the cytosolic subunit p67. Panel 2 includes close-up view with FAD closely located to the inner heme. Panel 3 includes a close-up view of NADPH where side chains from pre-TM1 helix of DUOX, not conserved in NOX2, forms hydrogen bonds with NADPH. **d.** Comparison of outer heme - ECL interactions and capping in NOX2 with DUOX1 (left panel, PDB 7d3f) and csNOX5 (right panel, PDB 5o0t) **e.** Overlay of DUOX1 (green) with the NOX2 core, showing that the M0/S0-helix is located at the same interface as p22.

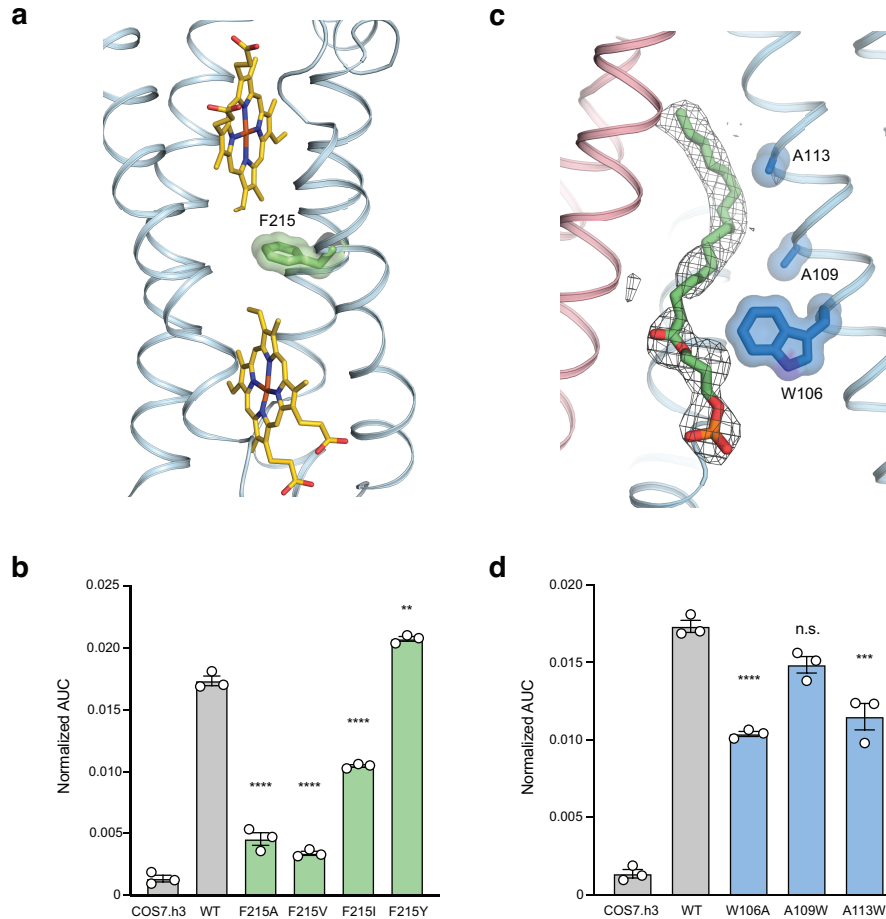

**Supplementary Figure 4. Functional assessment of NOX2 F215, W106, A109 and A113 mutations.** **a.** Phe215 is located between the inner heme and the outer heme and is potentially involved in electron transfer. **b.** Point mutations Phe215Ala, Phe215Val and Phe215Ile lead to strongly reduced NOX2 ROS production, while mutation Phe215Tyr slightly increases ROS production. The bar graph represents the area under the curve (AUC) of ROS production as measured by relative light units (RLU) in PMA-stimulated COS7 cells expressed with p22/p47/p67 (COS7.h3) or NOX2/p22/p47/p67 (WT with or without NOX2 point mutations), as detailed in the methods section (n=3 biologically independent samples, mean  $\pm$  SD). Data has been normalized by geometric mean fluorescence intensity of NOX2 surface staining and RLU of CellTiterGlo assay. **c.** Residues Trp106, Ala109 and Ala113 are located at the interface between NOX2 and

p22 and complement the shape of a lipid wedged in between p22 and NOX2. **d.** Mutation Trp106Ala and Ala113Trp reduce NOX2 ROS production by ~40% and 30%, respectively, while mutation Ala109Trp does not affect ROS production. Bar graphs were generated as described for **(b)**. Each mutant with reported p-value was generated from comparison to WT (second bar from the left) by unpaired two-sided t-test, n.s. = no statistical significance, \*\*P < 0.01, \*\*\*P < 0.001, \*\*\*\*P < 0.0001. Source data are available in the Source Data File.



|       |            |            |            | pre-TM1     | TM1        |                  |
|-------|------------|------------|------------|-------------|------------|------------------|
| NOX2  | -----      | -----      | -----      | -----MGNW   | AVNEGLSIFV | ILVWLG LNVF 24   |
| NOX1  | -----      | -----      | -----      | -----MGNW   | VVNHWFSVLF | LVVWLG LNVF 24   |
| NOX3  | -----      | -----      | -----      | -----MMGCW  | ILNEGLSTIL | VLSWLG LNFY 25   |
| NOX4  | -----      | -----      | -----      | ---MAVSWRSW | LANEGVKHLC | LFIWLSM NVL 28   |
| NOX5  | -----      | -----      | -----      | -----RP     | RRPRQLTRAY | WHNHRSQLFC 251   |
| DUOX1 | IRRRFGKKVT | SFQPLLFTEA | HREKFORSC  | HQTQQQKRF   | IENYRRHIGC | VAVFYA IAGG 1057 |
| DUOX2 | LKKRFGKKAA | VPTRPLYTEA | LQEKMQRGFL | AQKLQQYKRF  | VENYRRHIVC | VAIFSAICVG 1054  |

|       |            | loop A     |            | TM2        |             | loop B     |      |
|-------|------------|------------|------------|------------|-------------|------------|------|
| NOX2  | LFVWYYRVYD | IPPKFFYTRK | LLGSALALAR | APAACLNFNC | MLILLPVCRN  | LLSFLRGSSA | 84   |
| NOX1  | LFVDAFLKYE | KADKYYYTRK | ILGSTLACAR | ASALCLNFNS | TLILLPVCRN  | LLSFLRGTCS | 84   |
| NOX3  | LFIDTFYWE  | EEESFHYTRV | ILGSTLAWAR | ASALCLNFNC | MLILIPVSRN  | LISFIRGTSI | 85   |
| NOX4  | LFWKTFLLYN | QGPEYHYLHQ | MLGLGLCLSR | ASASVLNLNC | SLILLPMCRT  | LLAYLRGSQK | 88   |
| NOX5  | LFGLAA---- | -----SAHR  | DLGASVMVAK | GCGQCLNFDC | SFIAVLM LRR | CLTWLRATWL | 301  |
| DUOX1 | LFLERAYYYA | FAAHHTGITD | TTRVGIILSR | GTAASISFMF | SYILLTMCRN  | LITFLRETFL | 1117 |
| DUOX2 | VFADRAYYYG | FASPPSDIAQ | TTLVGIILSR | GTAASVSFMF | SYILLTMCRN  | LITFLRETFL | 1114 |

|       |            |            |            | TM3        |            | loop C -α1  |      |
|-------|------------|------------|------------|------------|------------|-------------|------|
| NOX2  | CCSTRVRRQL | DRNLTFHKMV | AWMIALHSAI | HTIAHLFNVE | WCVNARVMNS | DPYSVALSEL  | 144  |
| NOX1  | FCSRTLKRQL | DHNLTFHKLK | AYMICLHTAI | HTIAHLFNFD | CYSRSRQATD | GSLASILSSL  | 144  |
| NOX3  | CCRGPWRRQL | DKNLRFHKLK | AYGIAVNATI | HIVAHFFNLE | RYHWSQSEEA | OQLLAALSKL  | 145  |
| NOX4  | VPSRRTRRL  | DKSRTFHITC | GVTICIFSGV | HVAALVNAL  | NFSVNYSEDF | -----       | 138  |
| NOX5  | AQV----LPL | DQNIQFHQLM | GYVVVGLSLV | HTVAHTVNFV | LQAQAEASPF | QFWELLLT--- | 355  |
| DUOX1 | NRY----VPF | DAAVDFHRLI | ASTAIVLTVL | HSVGHVVNVY | LFSISPLSVL | SCLF---PGL  | 1170 |
| DUOX2 | NRY----VPF | DAAVDFHRLI | AMAAVVLAIL | HSAGHAVNVY | IFSVSPLSLL | ACIF---PNV  | 1167 |

|       |             | loop C     |            | loop C -α2 |             | TM4         |      | loop D |  |
|-------|-------------|------------|------------|------------|-------------|-------------|------|--------|--|
| NOX2  | GD--RQNESY  | LNFARKRIKN | PEGGLYLAVT | LLAGITGVVI | TLCLILIIITS | STKTIRR--SY | 201  |        |  |
| NOX1  | SHDEKKGGSW  | LNPIQSRNT- | --TVEYVTF  | SIAGLTGVIM | TIALILMVTS  | ATEFIRR--SY | 200  |        |  |
| NOX3  | GN--TPNESY  | LNPVRTFPTN | TTE---LLR  | TIAGVTGLVI | SLALVIMTS   | STEFIRO--AS | 199  |        |  |
| NOX4  | -----VE     | LNAARYDED  | P---RKLFT  | TVPGLTGVC  | VVVLFLMITA  | STYAIRV--SN | 186  |        |  |
| NOX5  | ---TRPGI--- | -----      | ---G---VVH | GSASPTGVAL | LLLLLLMFIC  | SSCYIRRS    | 394  |        |  |
| DUOX1 | -----F      | H---DDGSEL | PQKYWWFFQ  | TVPGLTGVVL | LLILAIMYVF  | ASHHFRR--RS | 1217 |        |  |
| DUOX2 | -----F      | V---NDGSKL | PQKFWWWFFQ | TVPGMTGVLL | LLVLAIMYVF  | ASHHFRR--RS | 1214 |        |  |

|       |            |            |            | loop E -β1  |            | loop E      |      |
|-------|------------|------------|------------|-------------|------------|-------------|------|
| NOX2  | FEVFWYTHHL | FVIFFIGLAI | HGAERIVRGQ | TAESLAV--HN | ITVC---EQK | ISEWGKIKE-  | 247  |
| NOX1  | FEVFWYTHHL | FIFYILGLGI | HGIGGIVRGQ | TEESMNEHP   | RK-C---AES | FEMWDDRDSH  | 246  |
| NOX3  | YELFWYTHHV | FIVFFLSLAI | HGTGRIVRGQ | TQDSLSL--HN | ITFC---RDR | YAEWQTVAQ-  | 245  |
| NOX4  | YDIFWYTHNL | FFVFYMLLTL | HVSGGLLKYQ | TNLDT---HP  | PG-CISLNRT | SSQNI SLPEY | 242  |
| NOX5  | FEVFWYTHLS | YLLVWLLLI  | HG-----    | -----       | -----      | -----       | 416  |
| DUOX1 | FRGFWLTHHL | YILLYVLLII | HGSFALIQL- | -----       | -----      | -----       | 1246 |
| DUOX2 | FRGFWLTHHL | YILLYVLLII | HGSYALIQL- | -----       | -----      | -----       | 1243 |

|       |            |            |             | loop E -β2    |            | TM6         |      |
|-------|------------|------------|-------------|---------------|------------|-------------|------|
| NOX2  | -----      | -----      | -----       | CP I-PQFAGNPP | MTWKWIVGPM | FLYLCERLVR  | 287  |
| NOX1  | -----      | -----      | -----       | CR R-PKFEHGP  | ESWKWILAPV | ILYICERILR  | 287  |
| NOX3  | -----      | -----      | -----       | CP V-PQFSGKEP | SAWKWILGPV | VLACERIR    | 285  |
| NOX4  | FSEHFHEPFP | EGFSKPAEFT | QHKFVKI--CM | EEPRFQANFP    | QTWLWISGPL | CLYCAERLYR  | 301  |
| NOX5  | -----      | -----      | -----       | -----P        | NFWKWLVP   | ILFFLEKAIG  | 437  |
| DUOX1 | -----      | -----      | -----       | -----P        | RFHIFFLVPA | I IYGGDKLVS | 1267 |
| DUOX2 | -----      | -----      | -----       | -----P        | TFHIYFLVPA | I IYGGDKLVS | 1264 |

## DH domain

|       |             |             |             |             |             |             |      |
|-------|-------------|-------------|-------------|-------------|-------------|-------------|------|
| NOX2  | FWRSQ-QKVV  | ITKVVVTHPFK | TIELOMK-KK  | GFKMEVGQYI  | FVKCPKVS KL | EWHPFTLTSA  | 345  |
| NOX1  | FYRSQ-QKVV  | ITKVV MHPSK | VLELOMN-KR  | GFSMEVGQYI  | FVNCPSISLL  | EWHPFTLTSA  | 345  |
| NOX3  | FWRFQ-QEVV  | ITKVVSHPSG  | VLELHMK-KR  | GFKMAPGQYI  | LVQCPAISSL  | EWHPFTLTSA  | 343  |
| NOX4  | YIRSN-KPVT  | IISVM SHPSD | VMEIRMV-KE  | NFKARPGQYI  | TLHCPSVSAL  | ENHPFTLTMC  | 359  |
| NOX5  | LAVSRMAAVC  | IMEVNLLPSK  | VTHLLIKRPP  | FFHYRPGDYL  | YLNIP TIARY | EWHPFTISSA  | 497  |
| DUOX1 | LSRKK-VEIS  | VVKAELLPSG  | VTHLRFORPO  | GFEYKSGQWV  | RIACLALGTT  | EYHPFTLTSA  | 1326 |
| DUOX2 | LSRKK-VEIS  | VVKAELLPSG  | VTYLQFORPO  | GFEYKSGQWV  | RIACLALGTT  | EYHPFTLTSA  | 1323 |
| <hr/> |             |             |             |             |             |             |      |
| NOX2  | PEE--DFFSI  | HIRIVGDWTE  | GLFNACGC--  | -----       | -----       | -----DKQEF  | 376  |
| NOX1  | PEE--DFFSI  | HIRAAGDWTE  | NLIRAFEQ--  | -----       | -----       | -----Q----  | 372  |
| NOX3  | PQE--DFFSV  | HIRAAGDWTA  | ALLEAFGA--  | -----       | -----       | -----EGQAL  | 374  |
| NOX4  | PTETKATFGV  | HLKIVGDWTE  | RFRDLLLPPS  | SQD-----    | -----       | -----SEILPF | 398  |
| NOX5  | PEQ-KDTIWL  | HIRSQGQWTN  | RLYESFKASD  | PLGRGSKRLS  | RSVTMRKSQR  | SSKGSEILLE  | 556  |
| DUOX1 | PHE--DTLSL  | HIRAAGPWTT  | RLREIYSAPT  | GDR-----    | -----       | -----       | 1357 |
| DUOX2 | PHE--DTLSL  | HIRAVGPWTT  | RLREIYSSPK  | GNG-----    | -----       | -----       | 1354 |
| <hr/> |             |             |             |             |             |             |      |
| NOX2  | QDAWKLPKIA  | VDGPFGTASE  | DVFSYEVV ML | VGAGIGVTPF  | ASILKSVWYK  | YC NN-----  | 430  |
| NOX1  | --YSP IPRIE | VDGPFGTASE  | DVFQYEVAVL  | VGAGIGVTPF  | ASILKSIWYK  | FQCA-----   | 424  |
| NOX3  | QEPWSL PRLA | VDGPFGTALT  | DVFHY PVCVC | VAAGIGVTPF  | AALLKSIWYK  | CSEA-----   | 428  |
| NOX4  | IQSRNYPKLY  | IDGPF GSPFE | ESLNYEVS LC | VAGGIGVTPF  | ASILNTLLD-  | ---D-----   | 448  |
| NOX5  | KHKFCNIKCY  | IDGPGYTPTR  | RIFASEHAVL  | IGAGIGITPF  | ASILQSIMYR  | HQKRKHTCPS  | 616  |
| DUOX1 | --CARYPKLY  | LDGPFGE GHQ | EWHKFEVSVL  | VGGGIGVTPF  | ASILKDLVFK  | SSVS-----   | 1409 |
| DUOX2 | --CAGYPKLY  | LDGPFGE GHQ | EWHKFEVSVL  | VGGGIGVTPF  | ASILKDLVFK  | SSLG-----   | 1406 |
| <hr/> |             |             |             |             |             |             |      |
| NOX2  | -----A      | TNLK LKKIYF | YWL CRDTHAF | EFWADLLQLL  | ESOMQ-ERNN  | AGFLSYNIYL  | 480  |
| NOX1  | -----D      | HNLKTKKIYF  | YWICRETGAF  | SWFNLLTSL   | EQEME-ELGK  | VGFLNYRFL   | 474  |
| NOX3  | -----Q      | TPLKLSKVYF  | YWICRDARAF  | EFWADLLLSL  | ETRMS-EQ GK | THFLSYHIFL  | 478  |
| NOX4  | -----W      | KPYKLRRLYF  | IWCRDIQSF   | RWFADLLCML  | HNKFW-QENR  | PDYVNIQLYL  | 498  |
| NOX5  | CQHSWIEGVQ  | DNMKLHKVDF  | IWINRDQRSF  | EFVSL LTKL  | EMDQAEAAQY  | GRFLELHMYM  | 676  |
| DUOX1 | -----C      | -QVFCCKIYF  | IWVTRTQRQF  | EWLADI IREV | ----E-ENDH  | QDLVSVHIYI  | 1454 |
| DUOX2 | -----S      | -QMLCKKIYF  | IWVTRTQRQF  | EWLADI IQEV | ----E-ENDH  | QDLVSVHIYV  | 1451 |
| <hr/> |             |             |             |             |             |             |      |
| NOX2  | TGWDESQANH  | FAV-----H   | H--DEEKDVI  | TGLKQKTLYG  | RPNWDNEFKT  | IASQHPN-TR  | 531  |
| NOX1  | TGWDSNIVGH  | AAL-----N   | F--DKATDIV  | TGLKQKTSFG  | RPMWDNEFST  | IATSHPK-SV  | 525  |
| NOX3  | TGW DENQALH | IAL-----H   | W--DENTDVI  | TGLKQKTFYG  | RPNWNNEFKQ  | IAYNHPS-SS  | 529  |
| NOX4  | SQTDGIQKII  | -----       | -----GEKY   | HALNSR LFIG | RPRWKLLFDE  | IAYNHRG-KT  | 541  |
| NOX5  | TSALGKNDMK  | AIGLOMALDL  | LANKEKDSI   | TGLQTRTQPG  | RPDWSKVFQK  | VAAEKKG--K  | 734  |
| DUOX1 | TQLAEKFDLR  | TTMLYICERH  | FQKVLNRS LF | TGLRSITHFG  | RPPFEPFFNS  | LQEVHPQVRK  | 1514 |
| DUOX2 | TQLAEKFDLR  | TTMLYICERH  | FQKVLNRS LF | TGLRSITHFG  | RPPFEPFFNS  | LQEVHPQVRK  | 1511 |
| <hr/> |             |             |             |             |             |             |      |
| NOX2  | IGVFLCGPEA  | LAETLSKQSI  | SNSESGPRGV  | HFIFNKENF-  |             |             | 570  |
| NOX1  | VG VFLCGPRT | LAKSLRKCC H | RYSSLDPRKV  | QFYFNKENF-  |             |             | 564  |
| NOX3  | IGVFFCGPKA  | LSRTLQKMCH  | LYSSADPRGV  | HFYFNKESF-  |             |             | 568  |
| NOX4  | VG VFCGPNS  | LSKTLHKLSN  | QNNS---YGT  | RFEYNKESFS  |             |             | 578  |
| NOX5  | VQVFFCGSPA  | LAKVLKGHCE  | KF-----     | GFRFFQENF-  |             |             | 765  |
| DUOX1 | IGV FSCGPPG | MTKNVEKACQ  | LINRQD--RT  | HFSHHYENF-  |             |             | 1551 |
| DUOX2 | IGV FSCGPPG | MTKNVEKACQ  | LVNRQD--RA  | HFMHHYENF-  |             |             | 1548 |

**Supplementary Figure 5. Sequence alignment of NOX2 with other members of the NOX superfamily.** Sequence alignment of NOX2 (uniprot: P04839) with NOX1/3/4/5 (uniprot:

Q9Y5S8, Q9HBY0, Q9NPH5, Q96PH1, respectively) and DUOX1/2 (uniprot: Q9NRD9, Q9NRD8). Sequences of NOX1/3/4 are full-length, while part of the NOX5 and DUOX1/2 sequences prior to TM1 have been omitted. The sequences were aligned with Clustal Omega and manually adjusted. The secondary structure allocation is based on NOX2 structure, with the structured pre-TM1 region observed in NOX5 and DUOX1 highlighted as a gray helix. Coloring or shading is as follows: histidines that coordinate the heme molecules are colored white in blue boxes, while residues at the oxygen reduction center are colored black in blue boxes. Glycosylation sites are colored purple and the two cysteines participating in a disulfide bond are in red boxes. Residues in the ECLs that are conserved in NOX1-4 that participate in a network of polar interactions connecting the outer heme and ECLs are colored in light orange boxes.

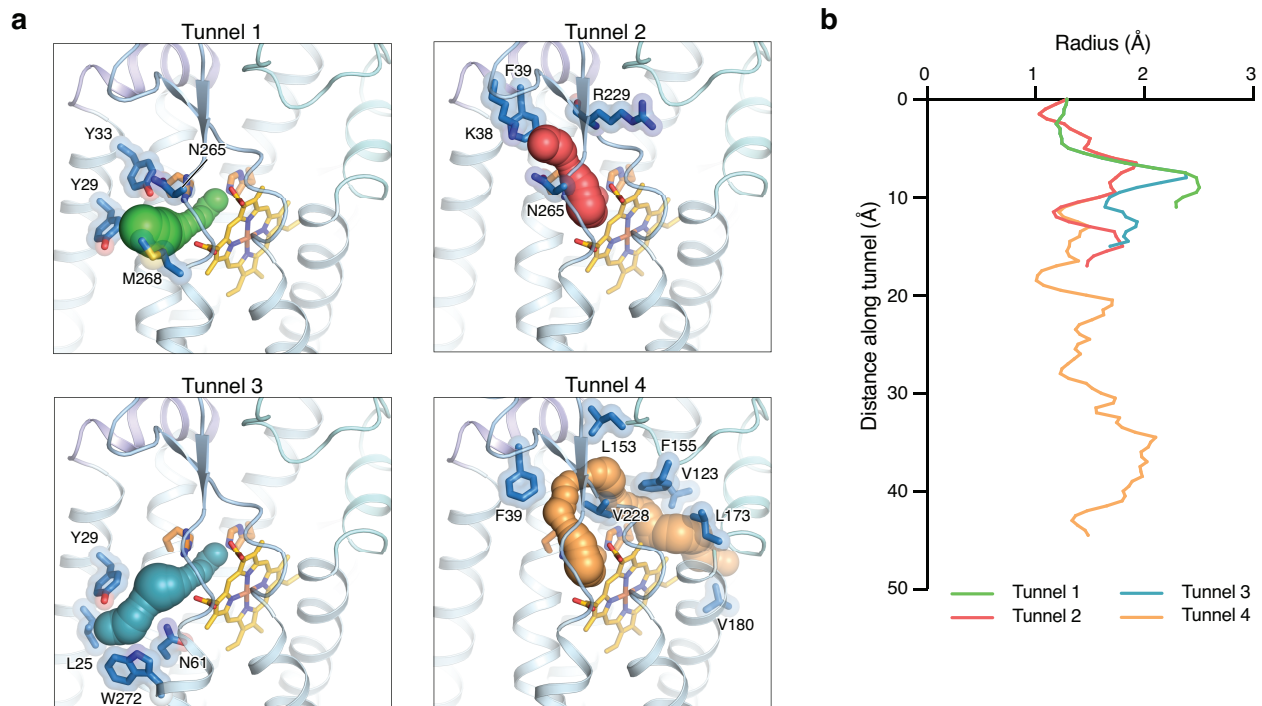

**Supplementary Figure 6. CAVER analysis reveals four tunnels that start from the reduction center. a.** Starting from His115, tunnels 1, 2, 3 and 4 are shown in green, red, blue and orange, respectively. Residues lining the tunnels are shown as blue sticks in transparent surface. **b.** Radius of each tunnel as tunnel distance from His115 increases.

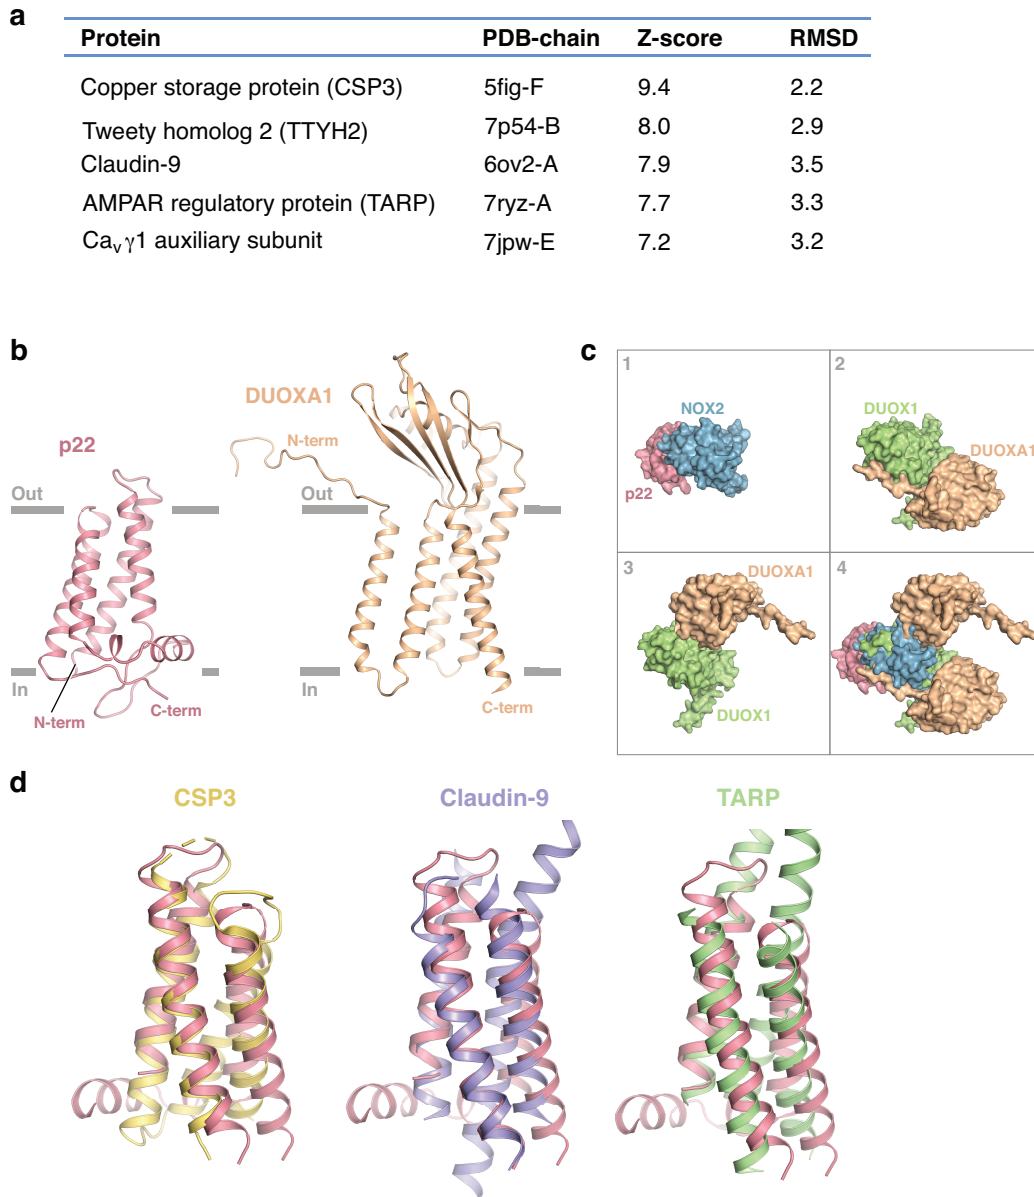

**Supplementary Figure 7. Structural homologs of p22 and comparison of p22 to DUOX1.**

**a.** Table of top hits from DALI search. **b.** Comparison of the fold and structure of auxiliary proteins p22 and DUOX1. **c.** The interface between NOX2-p22 (panel 1) is different compared to the two interfaces of DUOX1-DUOX1 (panel 2 and 3) as seen when superposing NOX2 and DUOX1 (panel 4). NOX2 was superposed with DUOX1 (PDB: 7d3f), which is a dimer of dimers (DUOX1-DUOX1- DUOX1-DUOX1). Only one DUOX1 is illustrated in panel 2-4 to simplify the

illustration of the two interfaces that DUOXA1 binds to. **d.** Superposition of three structural homologs of p22, all of which have diverse functions. Copper storage protein 3 (CSP3, PDB: 5fig-F, yellow) exists as a tetramer and is the closest structural homolog. Claudin-9 (PDB:6ov2-A, light blue) is part of the claudin superfamily that play a role in lateral adhesion and ion permeation between cells. Transmembrane AMPAR regulatory protein (TARP, PDB:7ryz-A, green) is an important regulator of AMPA receptors.

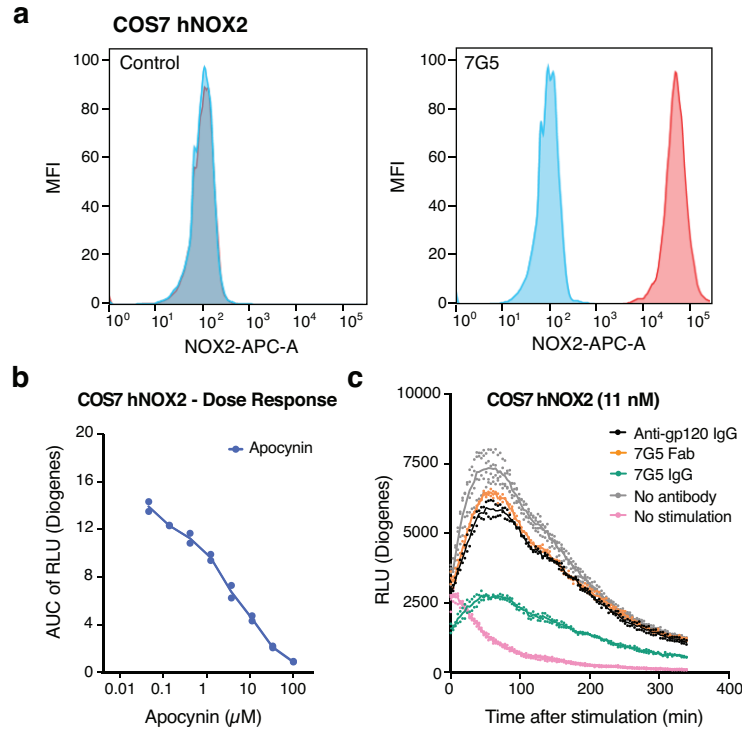

**Supplementary Figure 8. Characterization of anti-NOX2 7G5 in COS7 cells.** **a.** 7G5 IgG binds to recombinant hNOX2 expressed in COS7 cells. COS7 cells expressing partial hNOX2 (p22/p47/p67, left panel) or complete hNOX2 (NOX2-p22-p47-p67, right panel) are either stained with 7G5 IgG (red) or isotype control antibody (blue). An APC-conjugated secondary antibody was used to detect 7G5 IgG. **b.** Apocynin inhibits extracellular ROS that is produced by COS7 cells expressing recombinant hNOX2. Each replicate is the area under the curve (AUC) of extracellular ROS measured by a ROS production assay at a given concentration of apocynin (x-axis). The amount of ROS in the ROS production assay is represented as relative light units (RLU). Data represent two replicates per condition where mean values are represented as a solid line. **c.** Extracellular ROS production over time in the presence of 11 nM 7G5 IgG or Fab in COS7 cells. The amount of ROS is measured in relative light units (RLU) in COS7 cells expressing recombinant NOX2 enzymatic complex (NOX2-p22-p47-p67). Data represent two replicates per

time point where mean values are represented as a solid line. Source data are available in the Source Data File.



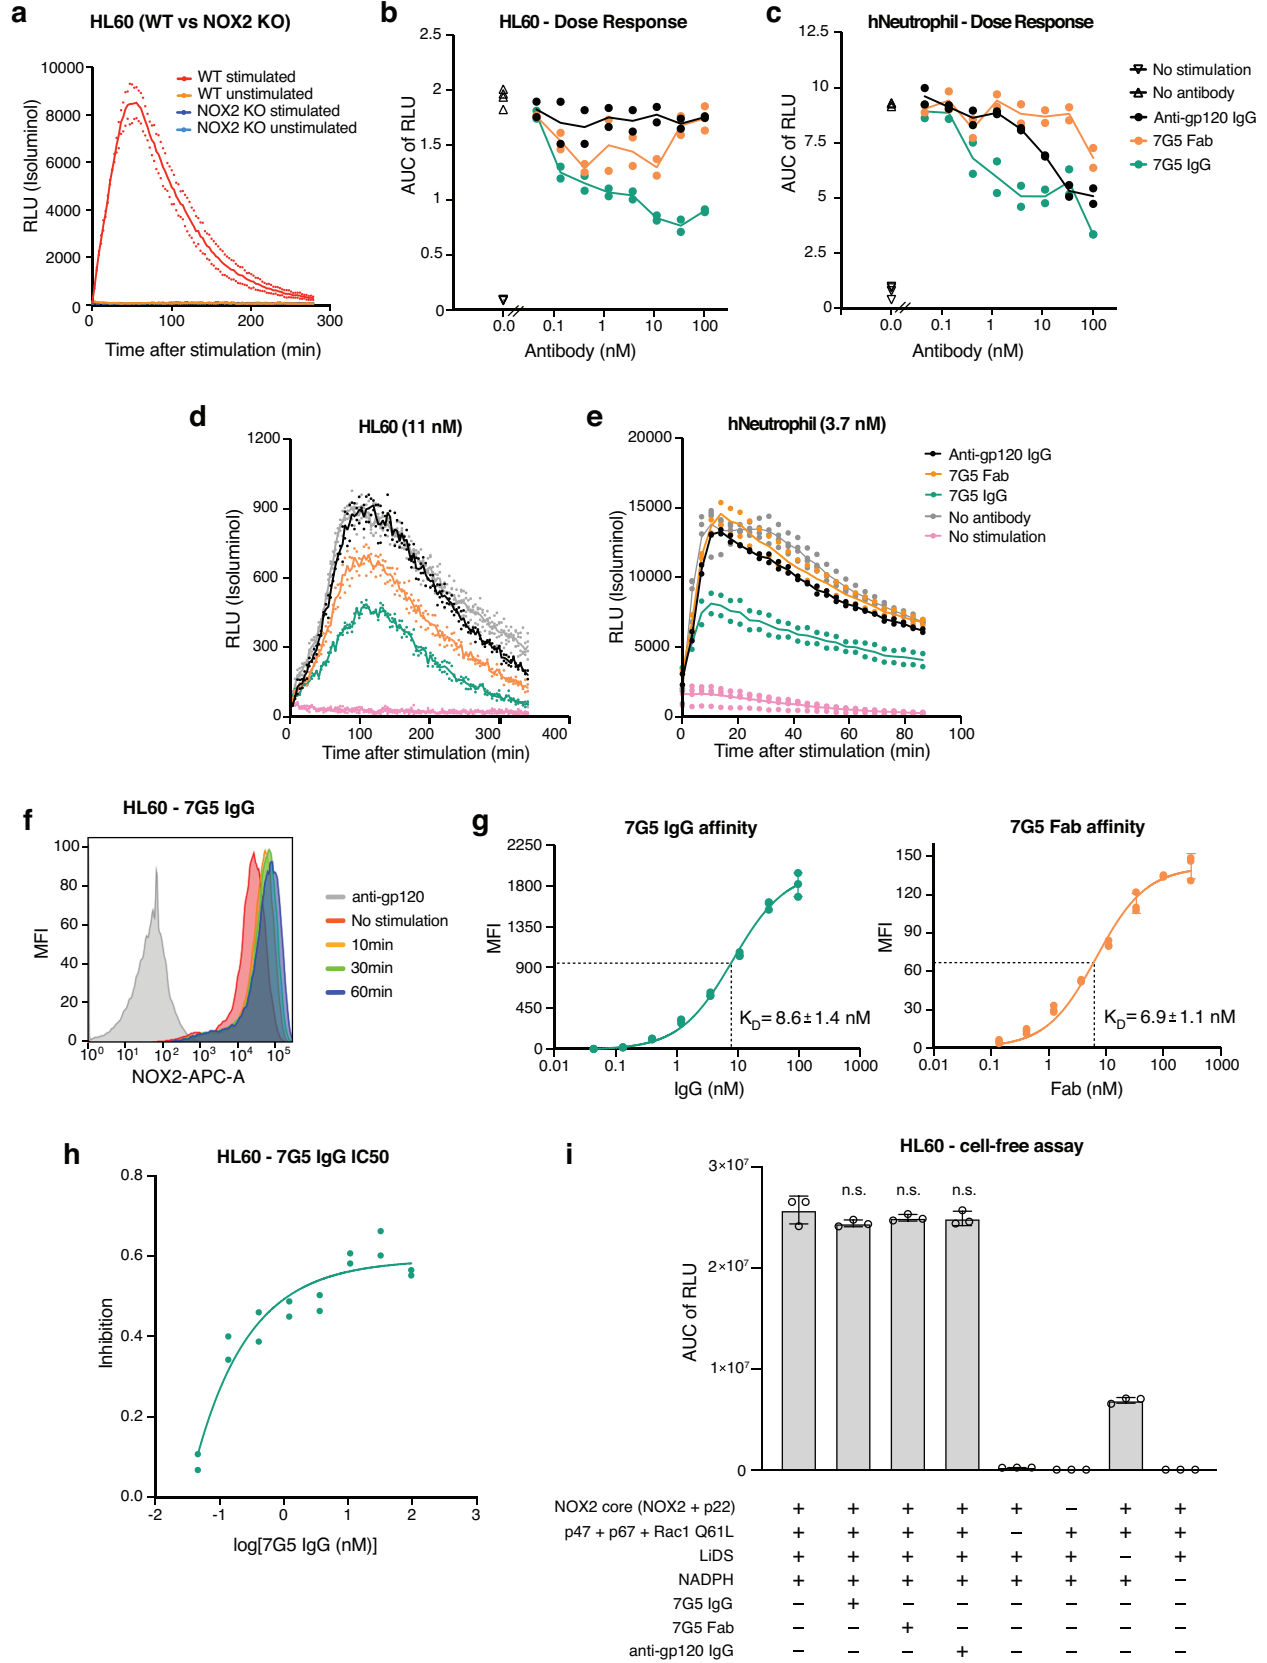

**Supplementary Figure 9. Characterization of anti-NOX2 7G5 in HL60 cells and human neutrophils.** **a.** Extracellular ROS production in wild type and NOX2-deficient HL60 cells (NOX2 KO HL60 cells). The ROS production is close to absent in PMA-stimulated NOX2 KO HL60 cells, revealing that ROS production in HL60 cells results primarily from NOX2 activity. Data represent two replicates per time point with mean value plotted as a solid line. The amount of ROS is measured as relative light units (RLU). **b-c** Extracellular ROS production assay of HL60 cells (**b**) and human neutrophils (**c**). Inhibition is observed when the concentration of 7G5 IgG (green), but not 7G5 Fab (orange), increases. Data represent two replicates per condition with solid line representing the mean value. ROS production in untreated cells without and with PMA stimulation is shown by downward (four replicates) and upward (four replicates) triangles, respectively. Each replicate is the area under the curve (AUC) of RLU from ROS production assay as illustrated in (**d, e**). **d-e.** Extracellular ROS over time in the presence of 11nM 7G5 IgG or Fab in HL60 cells (**d**) or 3.7nM 7G5 IgG or Fab in human neutrophils (**e**). Data represent two replicates per time point with mean value plotted as a solid line, similar to (**a**). **f.** Cell surface staining of HL60 cells with 7G5 IgG before (red) and after PMA stimulation (10min – orange, 30min – green, 60min – blue). The 7G5 IgG shows similar cell surface binding to inactive and active NOX2. **g.** Cell-based affinity of 7G5 IgG (left) and 7G5 Fab (right), as measured by FACS using HL60 in the presence of sodium azide, an internalization inhibitor. Data represent mean fluorescent intensity (MFI) with three replicates per condition. The curve (solid line) is fitted to the mean value, with error bars representing standard deviation (S.D). **h.** A one site Ki fit of the 7G5 IgG data shown in (**b**) was used to estimate the approximate half-maximal concentration of 7G5 IgG-mediated ROS inhibition. Data represent two replicates per condition with curve (solid line) fitted to the mean value. **i.** Cell-free ROS production assay of native NOX2 in HL60 cell membranes. ROS production from NOX2 in HL60 membranes is observed when NOX2 is supplemented with LiDS and the three cytosolic subunits: p47, p67 and RacQ61L. Addition of 7G5 IgG ( $p=0.7471$ ), 7G5

Fab ( $p=0.8445$ ) and anti-gp120 IgG ( $p=0.8312$ ) does not inhibit ROS production in a cell-free assay. Each condition of NOX2 enzymatic complex either with 7G5 IgG, 7G5 Fab or anti-gp120 IgG that has reported p-values was generated from comparison to NOX2 enzymatic complex (first bar on the bar graph starting from the left). The amount of ROS is measured in RLU and each replicate represents the AUC of RLU ( $n=3$  biologically independent samples, mean  $\pm$  SD). Each condition of NOX2 in the presence of 7G5 IgG, 7G5 Fab or anti-gp120 IgG was generated from comparison to NOX2 only (first bar from the left) by unpaired two-sided t-test, n.s. = no statistical significance (statistical significance cutoff  $p < 0.05$ ). Source data are available in the Source Data File.

## Supplementary Tables

Supplementary Table 1. Cryo-EM data collection, refinement and validation statistics

| NOX2-Fab7G5                                         |                           |
|-----------------------------------------------------|---------------------------|
| <b>Data collection and processing</b>               |                           |
| Magnification                                       | 165,000                   |
| Voltage (kV)                                        | 300                       |
| Electron exposure (e <sup>-</sup> /Å <sup>2</sup> ) | 40.4                      |
| Defocus range (μm)                                  | 0.8 – 1.8                 |
| Pixel Size (Å)                                      | 0.731                     |
| Symmetry imposed                                    | C1                        |
| Initial particle images (no.)                       | 581,619                   |
| Final particle images (no.)                         | 70,486                    |
| Map resolution (Å)                                  | 3.15                      |
| FSC threshold                                       | 0.143                     |
| Map resolution range (Å)                            | 2.8 – 31.6                |
| <b>Refinement</b>                                   |                           |
| Initial model gp91 <sup>phox</sup> (AlphaFold2)     | Uniprot P04839            |
| Initial model p22 <sup>phox</sup> (AlphaFold2)      | Uniprot P13498            |
| Model resolution (Å)                                | 3.32                      |
| FSC threshold                                       | 0.5                       |
| Model resolution range (Å)                          | 3.0 – 27.9                |
| Map sharpening B factor (Å <sup>2</sup> )           | -80.0                     |
| Model composition                                   |                           |
| Non-hydrogen atoms                                  | 10,109                    |
| Protein residues                                    | 621                       |
| Ligands                                             | HEM (2), NAG (3), POV (3) |
| R.m.s deviations                                    |                           |
| Bond lengths (Å)                                    | 0.003                     |
| Bond angles (°)                                     | 0.585                     |
| Validation                                          |                           |
| MolProbity Score                                    | 1.39                      |
| Clashscore                                          | 5.55                      |
| Poor rotamers (%)                                   | 0.00                      |
| CaBLAM outliers (%)                                 | 0.83                      |
| Ramachandran plot                                   |                           |
| Favored                                             | 97.55                     |
| Allowed                                             | 2.45                      |
| Disallowed                                          | 0.00                      |

**Supplementary table 1.** Statistics of data collection, three-dimensional reconstruction, and model refinement.

**Supplementary table 2. Reported CGD missense mutations in NOX2 and p22**

| <b>NOX2 subunit</b> | <b>Mutation</b>      | <b>Structure Location</b>     |
|---------------------|----------------------|-------------------------------|
| p22                 | Ala16Pro             | TM1 (interface)               |
| p22                 | Gly24Arg/Glu         | TM1 (interface)               |
| p22                 | Gly25Val/Asp         | TM1                           |
| p22                 | Gly46Ser             | TM2                           |
| p22                 | Leu51Pro/Arg         | TM2 (facing $\alpha$ 1-helix) |
| p22                 | Leu52Pro             | TM2 (core)                    |
| p22                 | Glu53Val/Gln         | TM2 (core)                    |
| p22                 | Pro55Arg             | ICL1                          |
| p22                 | Lys78Asn             | $\alpha$ 1-helix              |
| p22                 | Arg90Trp/Gly/Gln/Pro | TM3 (core)                    |
| p22                 | His94Arg             | TM3 (core)                    |
| p22                 | Leu96Pro             | TM3                           |
| p22                 | Leu105Arg            | ECL2 (interface)              |
| p22                 | Ala117Glu            | TM4 (core)                    |
| p22                 | Ser118Arg/Asn        | TM4 (core)                    |
| p22                 | Tyr121His            | TM4 (core)                    |
| p22                 | Ala124Ser/Val        | TM4 (core)                    |
| p22                 | Ala125Thr            | TM4 (core)                    |
| p22                 | Glu129Lys            | TM4 (core)                    |
| p22                 | Arg139Gln            | C-terminal*                   |
| p22                 | Pro156Gln            | P-domain*                     |
| NOX2                | Gly2Trp              | N-terminus*                   |
| NOX2                | Gly9Arg              | TM1                           |

|      |                       |         |
|------|-----------------------|---------|
| NOX2 | Trp18Cys              | TM1     |
| NOX2 | Leu19Val              | TM1     |
| NOX2 | Gly20Arg              | TM1     |
| NOX2 | Asn22Ile              | TM1     |
| NOX2 | Tyr41Asp              | Loop A  |
| NOX2 | Thr42Arg/Lys          | Loop A  |
| NOX2 | Leu45Arg              | Loop A  |
| NOX2 | Leu52Arg              | TM2     |
| NOX2 | Ala53Asp              | TM2     |
| NOX2 | Arg54Gly/Met/Ser      | TM2     |
| NOX2 | Ala55Asp              | TM2     |
| NOX2 | Pro56Leu              | TM2     |
| NOX2 | Ala57Glu              | TM2     |
| NOX2 | Cys59Arg/Phe/Tyr/Trp  | TM2     |
| NOX2 | Asn63Lys              | TM2     |
| NOX2 | Cys64Arg              | TM2     |
| NOX2 | Met65Arg              | TM2     |
| NOX2 | Leu66Pro/Arg          | TM2     |
| NOX2 | Arg91Leu              | Loop B* |
| NOX2 | His101Tyr/Arg/Asp/Asn | TM3     |
| NOX2 | Met107Arg             | TM3     |
| NOX2 | His111Arg             | TM3     |
| NOX2 | Ser112Pro/Tyr         | TM3     |
| NOX2 | His115Tyr/Gln/Asp     | TM3     |
| NOX2 | His119Arg/Pro         | TM3     |

|      |                           |        |
|------|---------------------------|--------|
| NOX2 | Leu120Pro                 | TM3    |
| NOX2 | Trp125Cys                 | TM3    |
| NOX2 | Cys126Arg                 | TM3    |
| NOX2 | Arg130Pro/Leu             | Loop C |
| NOX2 | Leu141Pro                 | Loop C |
| NOX2 | Ser142Pro/Phe             | Loop C |
| NOX2 | Leu144Pro                 | Loop C |
| NOX2 | Gly145Arg                 | Loop C |
| NOX2 | Leu153Arg                 | Loop C |
| NOX2 | Ala156Thr                 | Loop C |
| NOX2 | Thr178Pro                 | TM4    |
| NOX2 | Gly179Arg/Glu             | TM4    |
| NOX2 | Cys185Arg                 | TM4    |
| NOX2 | Ile187Arg                 | TM4    |
| NOX2 | Thr191Ser                 | TM4    |
| NOX2 | Ser193Pro/Phe             | TM4    |
| NOX2 | Arg198Trp                 | Loop D |
| NOX2 | Ser200Phe                 | Loop D |
| NOX2 | Phe205Ile/Leu             | TM5    |
| NOX2 | Thr208Arg, Thr503Ile      | TM5    |
| NOX2 | His209Tyr/Arg/Gln/Asp     | TM5    |
| NOX2 | Leu211Pro/Arg             | TM5    |
| NOX2 | His222Asn/Tyr/Arg/Leu/Gln | TM5    |
| NOX2 | Ala224Gly                 | Loop E |
| NOX2 | Glu225Val                 | Loop E |

|      |                           |        |
|------|---------------------------|--------|
| NOX2 | Gln231Pro                 | Loop E |
| NOX2 | Cys244Ser/Arg/Gly/Tyr     | Loop E |
| NOX2 | Gln246Pro                 | Loop E |
| NOX2 | Cys257Arg/Ser             | Loop E |
| NOX2 | Pro260Arg                 | Loop E |
| NOX2 | Gly275Asp                 | TM6    |
| NOX2 | Val295Glu                 | DHD*   |
| NOX2 | Lys299Asn                 | DHD*   |
| NOX2 | Thr302Pro                 | DHD*   |
| NOX2 | His303Asn/Tyr/Leu/Gln     | DHD*   |
| NOX2 | Pro304Arg/Leu             | DHD*   |
| NOX2 | Thr307Pro                 | DHD*   |
| NOX2 | Glu309Lys                 | DHD*   |
| NOX2 | Leu310Pro/Gln             | DHD*   |
| NOX2 | Met312Lys/Arg             | DHD*   |
| NOX2 | Gly322Glu/Arg             | DHD*   |
| NOX2 | Ile325Phe                 | DHD*   |
| NOX2 | Val327Asp                 | DHD*   |
| NOX2 | Cys329Arg                 | DHD*   |
| NOX2 | Ser333Pro                 | DHD*   |
| NOX2 | His338Gln/Tyr/Asn/Arg/Asp | DHD*   |
| NOX2 | Pro339Leu/His             | DHD*   |
| NOX2 | Phe340Ser                 | DHD*   |
| NOX2 | Thr341Ile/Lys             | DHD*   |
| NOX2 | Leu342Gln                 | DHD*   |



|      |                       |      |
|------|-----------------------|------|
| NOX2 | Thr343Pro/Ile         | DHD* |
| NOX2 | Ser344Pro/Phe         | DHD* |
| NOX2 | His354Pro/Arg         | DHD* |
| NOX2 | Ile355Asn             | DHD* |
| NOX2 | Arg356Pro             | DHD* |
| NOX2 | Gly359Val/Ala/Arg/    | DHD* |
| NOX2 | Trp361Arg/Gly/Leu/Cys | DHD* |
| NOX2 | Thr362Arg/Lys/Ile     | DHD* |
| NOX2 | Leu365Pro/Arg         | DHD* |
| NOX2 | Cys369Arg             | DHD* |
| NOX2 | Asp378Gly             | DHD* |
| NOX2 | Pro383Leu             | DHD* |
| NOX2 | Lys384Asn             | DHD* |
| NOX2 | Ile385Arg             | DHD* |
| NOX2 | Gly389Val/Glu/Ala/Arg | DHD* |
| NOX2 | Pro390Leu/Arg         | DHD* |
| NOX2 | Met405Arg             | DHD* |
| NOX2 | Gly408Glu/Arg         | DHD* |
| NOX2 | Ala409Glu             | DHD* |
| NOX2 | Ile411Phe             | DHD* |
| NOX2 | Gly412Glu/Arg/Val     | DHD* |
| NOX2 | Thr414Ile             | DHD* |
| NOX2 | Pro415Arg/Leu/His     | DHD* |
| NOX2 | Ser418Tyr/Phe         | DHD* |
| NOX2 | Leu420Pro             | DHD* |

|      |                               |      |
|------|-------------------------------|------|
| NOX2 | Ser422Pro                     | DHD* |
| NOX2 | Ala431Thr                     | DHD* |
| NOX2 | Ile439Val                     | DHD* |
| NOX2 | Cys445Arg                     | DHD* |
| NOX2 | Trp453Arg                     | DHD* |
| NOX2 | Asp456Asn                     | DHD* |
| NOX2 | Gly472Ser                     | DHD* |
| NOX2 | Leu474Arg                     | DHD* |
| NOX2 | Thr481Pro                     | DHD* |
| NOX2 | Trp483Arg                     | DHD* |
| NOX2 | Gln487His                     | DHD* |
| NOX2 | Ala488Asp                     | DHD* |
| NOX2 | His495Pro                     | DHD* |
| NOX2 | Asp500Tyr/His/Asn/Gly/Val/Glu | DHD* |
| NOX2 | Thr503Lys/Ile                 | DHD* |
| NOX2 | Leu505Arg/Pro                 | DHD* |
| NOX2 | Thr509Asn                     | DHD* |
| NOX2 | Tyr511Asp                     | DHD* |
| NOX2 | Trp516Arg/Cys                 | DHD* |
| NOX2 | Pro528Arg                     | DHD* |
| NOX2 | Val534Asp                     | DHD* |
| NOX2 | Cys537Arg                     | DHD* |
| NOX2 | Gly538Arg/Glu                 | DHD* |
| NOX2 | Leu542Ser                     | DHD* |
| NOX2 | Leu546Arg/Pro                 | DHD* |

NOX2

Glu568Lys

DHD\*

**Supplementary table 2.** Reported missense mutations in NOX2 and p22 that cause chronic granulomatous disease. Asterisks represent mutations in regions that have not been modeled in the NOX2 structure.

## Additional supplementary information – Uncropped SDS-PAGE, FACS gating strategy

Uncropped SDS PAGE from Supplementary Figure 1b

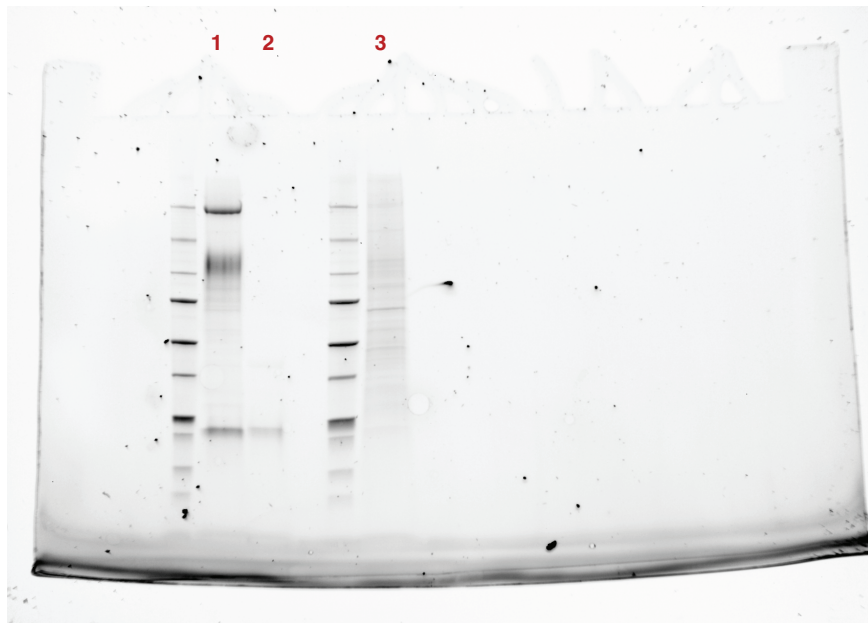

- 1 - Main peak - cryo-EM sample
- 2 - Second peak (excess 7G5 Fab)
- 3 - Unrelated sample - not part of NOX2-7G5 purification

FACS gating - Supplementary Figure 8a

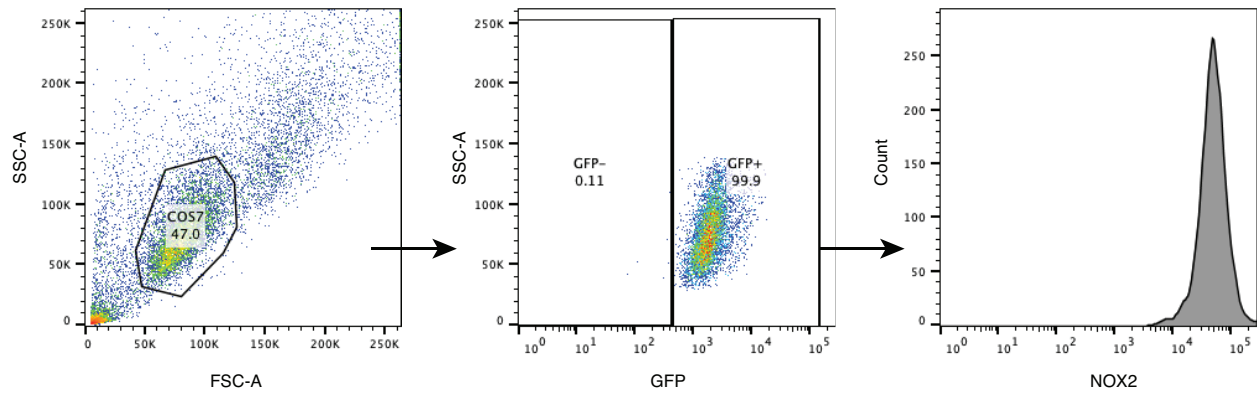

FACS gating - Supplementary Figure 9f

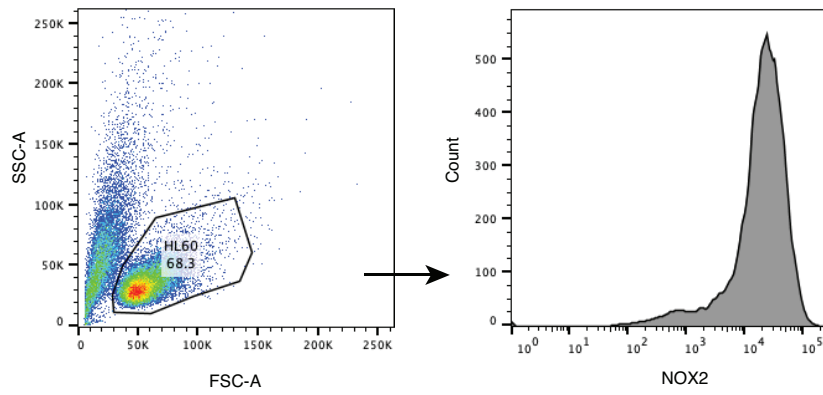

Supplement: 41467_2022_33711_MOESM1_ESM.pdf [file 41467_2022_33711_MOESM1_ESM.pdf]
